# Supplementary material
Source: Springer Nature journal article supplement (https://www.springermedizin.de/resource/supplementary/12967_2013_1722_MOESM1_ESM.pdf/9575152)

## Self-Efficacy for Walking

## Satisfaction with Physical Function

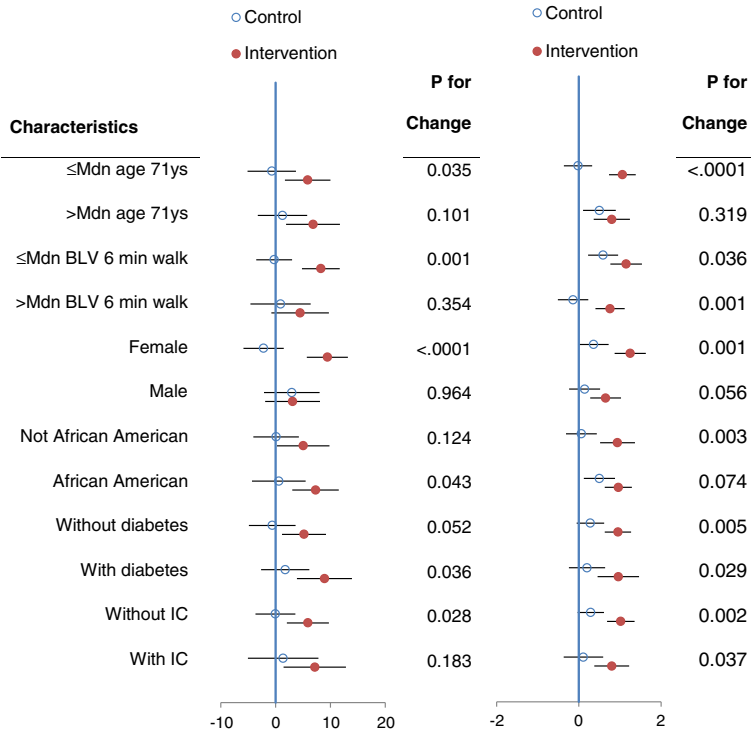

Supplement: MOESM1 [file 9575152]
